# Supplementary material for: Analysis of Retinal Perfusion in Children, Adolescents, and Young Adults with Type 1 Diabetes Using Optical Coherence Tomography Angiography
Source: Hindawi journal article supplement (doi:10.1155/2019/5410672), 2019-05-08
Supplement: f1 [file 5410672.f1.pdf]

**Table S1. Vascular densities of the right eye in patients with type 1 diabetes and healthy controls**

|             | Controls<br>N = 48 | Diabetes type 1<br>N = 53 |
|-------------|--------------------|---------------------------|
| S-Fovea     | 0.32 (0.28; 0.34)  | 0.31 (0.29; 0.35)         |
| S-ParaFovea | 0.58 (0.57; 0.59)  | 0.57 (0.55; 0.58)         |
| S-Temporal  | 0.57 (0.55; 0.59)  | 0.55 (0.55; 0.56)         |
| S-Superior  | 0.57 (0.54; 0.59)  | 0.56 (0.54; 0.58)         |
| S-Nasal     | 0.57 (0.55; 0.60)  | 0.57 (0.55; 0.58)         |
| S-Inferior  | 0.57 (0.54; 0.59)  | 0.56 (0.53; 0.57)         |
| D-Fovea     | 0.30 (0.27; 0.36)  | 0.33 (0.29; 0.37)         |
| D-ParaFovea | 0.65 (0.64; 0.66)  | 0.64 (0.63; 0.65)         |
| D-Temporal  | 0.65 (0.64; 0.66)  | 0.64 (0.62; 0.65)         |
| D-Superior  | 0.66 (0.64; 0.67)  | 0.66 (0.64; 0.67)         |
| D-Nasal     | 0.65 (0.64; 0.67)  | 0.65 (0.64; 0.66)         |
| D-Inferior  | 0.66 (0.64; 0.68)  | 0.66 (0.64; 0.67)         |

**Legend to table S1**

Values are medians and interquartile ranges and are provided for descriptive purposes only.

Abbreviations: S- = superficial plexus; D- = deep plexus.

**Table S2. Vascular densities of the left eye in patients with type 1 diabetes and healthy controls**

|             | Controls          | Type 1 diabetes   |
|-------------|-------------------|-------------------|
|             | N = 48            | N = 53            |
| S-Fovea     | 0.31 (0.27; 0.34) | 0.32 (0.28; 0.35) |
| S-ParaFovea | 0.58 (0.56; 0.59) | 0.57 (0.56; 0.58) |
| S-Temporal  | 0.57 (0.55; 0.58) | 0.55 (0.54; 0.55) |
| S-Superior  | 0.57 (0.56; 0.59) | 0.56 (0.54; 0.58) |
| S-Nasal     | 0.57 (0.56; 0.59) | 0.56 (0.54; 0.58) |
| S-Inferior  | 0.56 (0.54; 0.58) | 0.55 (0.53; 0.57) |
| D-Fovea     | 0.31 (0.26; 0.34) | 0.32 (0.29; 0.37) |
| D-ParaFovea | 0.65 (0.64; 0.66) | 0.65 (0.64; 0.66) |
| D-Temporal  | 0.64 (0.63; 0.67) | 0.63 (0.61; 0.65) |
| D-Superior  | 0.66 (0.64; 0.67) | 0.65 (0.64; 0.67) |
| D-Nasal     | 0.65 (0.64; 0.66) | 0.65 (0.64; 0.66) |
| D-Inferior  | 0.66 (0.64; 0.67) | 0.66 (0.64; 0.67) |

**Legend to table S2**

Values are medians and interquartile ranges and are provided for descriptive purposes only.

Abbreviations: S- = superficial plexus; D- = deep plexus.

**Table S3. Predictors and vascular densities in patients with type 1 diabetes and healthy controls**

| M1                                                                                                                                                               |                                          |
|------------------------------------------------------------------------------------------------------------------------------------------------------------------|------------------------------------------|
| SFovea                                                                                                                                                           |                                          |
| Age (years)                                                                                                                                                      | 0.007<br>[-0.002,0.016]                  |
| T1DM                                                                                                                                                             | 0.036<br>[-0.044,0.116]                  |
| Constant                                                                                                                                                         | -0.901 <sup>***</sup><br>[-1.049,-0.753] |
| Observations                                                                                                                                                     | 202                                      |
| 95% confidence intervals in brackets<br>Values are regression coefficients from fractional GLM with logit link<br>* $p < 0.05$ , ** $p < 0.01$ , *** $p < 0.001$ |                                          |
| M2                                                                                                                                                               |                                          |
| SFovea                                                                                                                                                           |                                          |
| T1DM duration (years)                                                                                                                                            | -0.003<br>[-0.015,0.009]                 |
| T1DM                                                                                                                                                             | 0.000<br>[0.000,0.000]                   |
| Constant                                                                                                                                                         | -0.738 <sup>***</sup><br>[-0.835,-0.640] |
| Observations                                                                                                                                                     | 106                                      |
| 95% confidence intervals in brackets<br>Values are regression coefficients from fractional GLM with logit link<br>* $p < 0.05$ , ** $p < 0.01$ , *** $p < 0.001$ |                                          |
| M3                                                                                                                                                               |                                          |
| SFovea                                                                                                                                                           |                                          |
| Age at onset (years)                                                                                                                                             | 0.006<br>[-0.009,0.020]                  |
| T1DM                                                                                                                                                             | 0.000<br>[0.000,0.000]                   |
| Constant                                                                                                                                                         | -0.809 <sup>***</sup><br>[-0.958,-0.659] |
| Observations                                                                                                                                                     | 106                                      |
| 95% confidence intervals in brackets<br>Values are regression coefficients from fractional GLM with logit link<br>* $p < 0.05$ , ** $p < 0.01$ , *** $p < 0.001$ |                                          |
| M4                                                                                                                                                               |                                          |
| SFovea                                                                                                                                                           |                                          |
| Mean HbA1c from                                                                                                                                                  | -0.019                                   |

|                  |                                          |
|------------------|------------------------------------------|
| onset to OCT (%) | [-0.050,0.011]                           |
| T1DM             | 0.000<br>[0.000,0.000]                   |
| Constant         | -0.615 <sup>***</sup><br>[-0.865,-0.365] |

|              |     |
|--------------|-----|
| Observations | 100 |
|--------------|-----|

95% confidence intervals in brackets

Values are regression coefficients from fractional GLM with logit link

\*  $p < 0.05$ , \*\*  $p < 0.01$ , \*\*\*  $p < 0.001$

|                            |                                          |
|----------------------------|------------------------------------------|
| M5                         |                                          |
| SFovea                     |                                          |
| LDL-cholesterol<br>(mg/dl) | 0.002<br>[-0.001,0.005]                  |
| T1DM                       | 0.000<br>[0.000,0.000]                   |
| Constant                   | -0.956 <sup>***</sup><br>[-1.227,-0.684] |

|              |     |
|--------------|-----|
| Observations | 106 |
|--------------|-----|

95% confidence intervals in brackets

Values are regression coefficients from fractional GLM with logit link

\*  $p < 0.05$ , \*\*  $p < 0.01$ , \*\*\*  $p < 0.001$

|                            |                                          |
|----------------------------|------------------------------------------|
| M6                         |                                          |
| SFovea                     |                                          |
| HDL-cholesterol<br>(mg/dl) | 0.005 <sup>*</sup><br>[0.000,0.010]      |
| T1DM                       | 0.000<br>[0.000,0.000]                   |
| Constant                   | -1.023 <sup>***</sup><br>[-1.271,-0.775] |

|              |     |
|--------------|-----|
| Observations | 106 |
|--------------|-----|

95% confidence intervals in brackets

Values are regression coefficients from fractional GLM with logit link

\*  $p < 0.05$ , \*\*  $p < 0.01$ , \*\*\*  $p < 0.001$

|                     |                                          |
|---------------------|------------------------------------------|
| M7                  |                                          |
| SFovea              |                                          |
| Cholesterol (mg/dl) | 0.002 <sup>*</sup><br>[0.000,0.004]      |
| T1DM                | 0.000<br>[0.000,0.000]                   |
| Constant            | -1.116 <sup>***</sup><br>[-1.455,-0.776] |

|                                                                                                                                                                  |                              |
|------------------------------------------------------------------------------------------------------------------------------------------------------------------|------------------------------|
| Observations                                                                                                                                                     | 106                          |
| 95% confidence intervals in brackets<br>Values are regression coefficients from fractional GLM with logit link<br>* $p < 0.05$ , ** $p < 0.01$ , *** $p < 0.001$ |                              |
| M8                                                                                                                                                               |                              |
| SFovea                                                                                                                                                           |                              |
| Triglycerides (mg/dl)                                                                                                                                            | -0.000<br>[-0.001,0.001]     |
| T1DM                                                                                                                                                             | 0.000<br>[0.000,0.000]       |
| Constant                                                                                                                                                         | -0.750***<br>[-0.856,-0.645] |
| Observations                                                                                                                                                     | 106                          |
| 95% confidence intervals in brackets<br>Values are regression coefficients from fractional GLM with logit link<br>* $p < 0.05$ , ** $p < 0.01$ , *** $p < 0.001$ |                              |
| M9                                                                                                                                                               |                              |
| SParaFovea                                                                                                                                                       |                              |
| Age (years)                                                                                                                                                      | 0.001<br>[-0.002,0.003]      |
| T1DM                                                                                                                                                             | -0.049**<br>[-0.083,-0.015]  |
| Constant                                                                                                                                                         | 0.310***<br>[0.264,0.356]    |
| Observations                                                                                                                                                     | 202                          |
| 95% confidence intervals in brackets<br>Values are regression coefficients from fractional GLM with logit link<br>* $p < 0.05$ , ** $p < 0.01$ , *** $p < 0.001$ |                              |
| M10                                                                                                                                                              |                              |
| SParaFovea                                                                                                                                                       |                              |
| T1DM duration (years)                                                                                                                                            | -0.002<br>[-0.006,0.002]     |
| T1DM                                                                                                                                                             | 0.000<br>[0.000,0.000]       |
| Constant                                                                                                                                                         | 0.285***<br>[0.246,0.324]    |
| Observations                                                                                                                                                     | 106                          |
| 95% confidence intervals in brackets<br>Values are regression coefficients from fractional GLM with logit link<br>* $p < 0.05$ , ** $p < 0.01$ , *** $p < 0.001$ |                              |
| M11                                                                                                                                                              |                              |
| SParaFovea                                                                                                                                                       |                              |
| Age at onset (years)                                                                                                                                             | 0.004                        |

|                                                                                                                                                                  |                                       |
|------------------------------------------------------------------------------------------------------------------------------------------------------------------|---------------------------------------|
|                                                                                                                                                                  | [-0.002,0.010]                        |
| T1DM                                                                                                                                                             | 0.000<br>[0.000,0.000]                |
| Constant                                                                                                                                                         | 0.237 <sup>***</sup><br>[0.180,0.293] |
| Observations                                                                                                                                                     | 106                                   |
| 95% confidence intervals in brackets<br>Values are regression coefficients from fractional GLM with logit link<br>* $p < 0.05$ , ** $p < 0.01$ , *** $p < 0.001$ |                                       |

|                                                                                                                                                                  |                                      |
|------------------------------------------------------------------------------------------------------------------------------------------------------------------|--------------------------------------|
|                                                                                                                                                                  | M12                                  |
| SParaFovea<br>Mean HbA1c from<br>onset to OCT (%)                                                                                                                | -0.042<br>[-0.097,0.014]             |
| T1DM                                                                                                                                                             | 0.000<br>[0.000,0.000]               |
| Constant                                                                                                                                                         | 0.591 <sup>**</sup><br>[0.178,1.005] |
| Observations                                                                                                                                                     | 100                                  |
| 95% confidence intervals in brackets<br>Values are regression coefficients from fractional GLM with logit link<br>* $p < 0.05$ , ** $p < 0.01$ , *** $p < 0.001$ |                                      |

|                                                                                                                                                                  |                                       |
|------------------------------------------------------------------------------------------------------------------------------------------------------------------|---------------------------------------|
|                                                                                                                                                                  | M13                                   |
| SParaFovea<br>LDL-cholesterol<br>(mg/dl)                                                                                                                         | 0.000<br>[-0.001,0.001]               |
| T1DM                                                                                                                                                             | 0.000<br>[0.000,0.000]                |
| Constant                                                                                                                                                         | 0.256 <sup>***</sup><br>[0.135,0.376] |
| Observations                                                                                                                                                     | 106                                   |
| 95% confidence intervals in brackets<br>Values are regression coefficients from fractional GLM with logit link<br>* $p < 0.05$ , ** $p < 0.01$ , *** $p < 0.001$ |                                       |

|                                          |                                       |
|------------------------------------------|---------------------------------------|
|                                          | M14                                   |
| SParaFovea<br>HDL-cholesterol<br>(mg/dl) | -0.000<br>[-0.003,0.002]              |
| T1DM                                     | 0.000<br>[0.000,0.000]                |
| Constant                                 | 0.294 <sup>***</sup><br>[0.190,0.397] |

|                                                                                                                                                                  |                              |
|------------------------------------------------------------------------------------------------------------------------------------------------------------------|------------------------------|
| Observations                                                                                                                                                     | 106                          |
| 95% confidence intervals in brackets<br>Values are regression coefficients from fractional GLM with logit link<br>* $p < 0.05$ , ** $p < 0.01$ , *** $p < 0.001$ |                              |
| M15                                                                                                                                                              |                              |
| SParaFovea                                                                                                                                                       |                              |
| Cholesterol (mg/dl)                                                                                                                                              | -0.000<br>[-0.001,0.001]     |
| T1DM                                                                                                                                                             | 0.000<br>[0.000,0.000]       |
| Constant                                                                                                                                                         | 0.279*<br>[0.065,0.492]      |
| Observations                                                                                                                                                     | 106                          |
| 95% confidence intervals in brackets<br>Values are regression coefficients from fractional GLM with logit link<br>* $p < 0.05$ , ** $p < 0.01$ , *** $p < 0.001$ |                              |
| M16                                                                                                                                                              |                              |
| SParaFovea                                                                                                                                                       |                              |
| Triglycerides (mg/dl)                                                                                                                                            | -0.000<br>[-0.001,0.001]     |
| T1DM                                                                                                                                                             | 0.000<br>[0.000,0.000]       |
| Constant                                                                                                                                                         | 0.282***<br>[0.229,0.335]    |
| Observations                                                                                                                                                     | 106                          |
| 95% confidence intervals in brackets<br>Values are regression coefficients from fractional GLM with logit link<br>* $p < 0.05$ , ** $p < 0.01$ , *** $p < 0.001$ |                              |
| M17                                                                                                                                                              |                              |
| STemporal                                                                                                                                                        |                              |
| Age (years)                                                                                                                                                      | 0.000<br>[-0.003,0.004]      |
| T1DM                                                                                                                                                             | -0.077***<br>[-0.110,-0.044] |
| Constant                                                                                                                                                         | 0.266***<br>[0.216,0.316]    |
| Observations                                                                                                                                                     | 202                          |
| 95% confidence intervals in brackets<br>Values are regression coefficients from fractional GLM with logit link<br>* $p < 0.05$ , ** $p < 0.01$ , *** $p < 0.001$ |                              |
| M18                                                                                                                                                              |                              |
| STemporal                                                                                                                                                        |                              |
| T1DM duration                                                                                                                                                    | 0.002                        |

|              |                                       |
|--------------|---------------------------------------|
| (years)      | [-0.001,0.005]                        |
| T1DM         | 0.000<br>[0.000,0.000]                |
| Constant     | 0.182 <sup>***</sup><br>[0.153,0.210] |
| Observations | 106                                   |

95% confidence intervals in brackets

Values are regression coefficients from fractional GLM with logit link

\*  $p < 0.05$ , \*\*  $p < 0.01$ , \*\*\*  $p < 0.001$

|                      |                                       |
|----------------------|---------------------------------------|
| M19                  |                                       |
| STemporal            |                                       |
| Age at onset (years) | -0.001<br>[-0.006,0.004]              |
| T1DM                 | 0.000<br>[0.000,0.000]                |
| Constant             | 0.205 <sup>***</sup><br>[0.156,0.253] |
| Observations         | 106                                   |

95% confidence intervals in brackets

Values are regression coefficients from fractional GLM with logit link

\*  $p < 0.05$ , \*\*  $p < 0.01$ , \*\*\*  $p < 0.001$

|                                  |                                     |
|----------------------------------|-------------------------------------|
| M20                              |                                     |
| STemporal                        |                                     |
| Mean HbA1c from onset to OCT (%) | -0.016<br>[-0.050,0.019]            |
| T1DM                             | 0.000<br>[0.000,0.000]              |
| Constant                         | 0.315 <sup>*</sup><br>[0.059,0.571] |
| Observations                     | 100                                 |

95% confidence intervals in brackets

Values are regression coefficients from fractional GLM with logit link

\*  $p < 0.05$ , \*\*  $p < 0.01$ , \*\*\*  $p < 0.001$

|                         |                                       |
|-------------------------|---------------------------------------|
| M21                     |                                       |
| STemporal               |                                       |
| LDL-cholesterol (mg/dl) | 0.000<br>[-0.001,0.001]               |
| T1DM                    | 0.000<br>[0.000,0.000]                |
| Constant                | 0.189 <sup>***</sup><br>[0.100,0.279] |



|                                                                        |     |
|------------------------------------------------------------------------|-----|
| Observations                                                           | 106 |
| 95% confidence intervals in brackets                                   |     |
| Values are regression coefficients from fractional GLM with logit link |     |
| * $p < 0.05$ , ** $p < 0.01$ , *** $p < 0.001$                         |     |

|                         |                           |
|-------------------------|---------------------------|
| M22                     |                           |
| STemporal               |                           |
| HDL-cholesterol (mg/dl) | -0.001<br>[-0.003,0.000]  |
| T1DM                    | 0.000<br>[0.000,0.000]    |
| Constant                | 0.262***<br>[0.183,0.342] |

|                                                                        |     |
|------------------------------------------------------------------------|-----|
| Observations                                                           | 106 |
| 95% confidence intervals in brackets                                   |     |
| Values are regression coefficients from fractional GLM with logit link |     |
| * $p < 0.05$ , ** $p < 0.01$ , *** $p < 0.001$                         |     |

|                     |                          |
|---------------------|--------------------------|
| M23                 |                          |
| STemporal           |                          |
| Cholesterol (mg/dl) | -0.000<br>[-0.001,0.001] |
| T1DM                | 0.000<br>[0.000,0.000]   |
| Constant            | 0.212**<br>[0.074,0.350] |

|                                                                        |     |
|------------------------------------------------------------------------|-----|
| Observations                                                           | 106 |
| 95% confidence intervals in brackets                                   |     |
| Values are regression coefficients from fractional GLM with logit link |     |
| * $p < 0.05$ , ** $p < 0.01$ , *** $p < 0.001$                         |     |

|                       |                           |
|-----------------------|---------------------------|
| M24                   |                           |
| STemporal             |                           |
| Triglycerides (mg/dl) | 0.000<br>[-0.000,0.001]   |
| T1DM                  | 0.000<br>[0.000,0.000]    |
| Constant              | 0.179***<br>[0.145,0.214] |

|                                                                        |     |
|------------------------------------------------------------------------|-----|
| Observations                                                           | 106 |
| 95% confidence intervals in brackets                                   |     |
| Values are regression coefficients from fractional GLM with logit link |     |
| * $p < 0.05$ , ** $p < 0.01$ , *** $p < 0.001$                         |     |

|             |       |
|-------------|-------|
| M25         |       |
| SSuperior   |       |
| Age (years) | 0.004 |

|                                                                                                                                                                  |                                         |
|------------------------------------------------------------------------------------------------------------------------------------------------------------------|-----------------------------------------|
|                                                                                                                                                                  | [-0.000,0.008]                          |
| T1DM                                                                                                                                                             | -0.072 <sup>**</sup><br>[-0.115,-0.028] |
| Constant                                                                                                                                                         | 0.220 <sup>***</sup><br>[0.154,0.286]   |
| Observations                                                                                                                                                     | 202                                     |
| 95% confidence intervals in brackets<br>Values are regression coefficients from fractional GLM with logit link<br>* $p < 0.05$ , ** $p < 0.01$ , *** $p < 0.001$ |                                         |

|                                                                                                                                                                  |                                       |
|------------------------------------------------------------------------------------------------------------------------------------------------------------------|---------------------------------------|
|                                                                                                                                                                  | M26                                   |
| SSuperior                                                                                                                                                        |                                       |
| T1DM duration<br>(years)                                                                                                                                         | 0.002<br>[-0.004,0.008]               |
| T1DM                                                                                                                                                             | 0.000<br>[0.000,0.000]                |
| Constant                                                                                                                                                         | 0.195 <sup>***</sup><br>[0.145,0.245] |
| Observations                                                                                                                                                     | 106                                   |
| 95% confidence intervals in brackets<br>Values are regression coefficients from fractional GLM with logit link<br>* $p < 0.05$ , ** $p < 0.01$ , *** $p < 0.001$ |                                       |

|                                                                                                                                                                  |                                       |
|------------------------------------------------------------------------------------------------------------------------------------------------------------------|---------------------------------------|
|                                                                                                                                                                  | M27                                   |
| SSuperior                                                                                                                                                        |                                       |
| Age at onset (years)                                                                                                                                             | 0.002<br>[-0.007,0.010]               |
| T1DM                                                                                                                                                             | 0.000<br>[0.000,0.000]                |
| Constant                                                                                                                                                         | 0.199 <sup>***</sup><br>[0.120,0.277] |
| Observations                                                                                                                                                     | 106                                   |
| 95% confidence intervals in brackets<br>Values are regression coefficients from fractional GLM with logit link<br>* $p < 0.05$ , ** $p < 0.01$ , *** $p < 0.001$ |                                       |

|                                     |                                      |
|-------------------------------------|--------------------------------------|
|                                     | M28                                  |
| SSuperior                           |                                      |
| Mean HbA1c from<br>onset to OCT (%) | -0.030<br>[-0.068,0.008]             |
| T1DM                                | 0.000<br>[0.000,0.000]               |
| Constant                            | 0.448 <sup>**</sup><br>[0.164,0.731] |

|                                                                        |     |
|------------------------------------------------------------------------|-----|
| Observations                                                           | 100 |
| 95% confidence intervals in brackets                                   |     |
| Values are regression coefficients from fractional GLM with logit link |     |
| * $p < 0.05$ , ** $p < 0.01$ , *** $p < 0.001$                         |     |

|                         |                         |
|-------------------------|-------------------------|
|                         | M29                     |
| SSuperior               |                         |
| LDL-cholesterol (mg/dl) | 0.001<br>[-0.001,0.002] |
| T1DM                    | 0.000<br>[0.000,0.000]  |
| Constant                | 0.161*<br>[0.005,0.317] |

|                                                                        |     |
|------------------------------------------------------------------------|-----|
| Observations                                                           | 106 |
| 95% confidence intervals in brackets                                   |     |
| Values are regression coefficients from fractional GLM with logit link |     |
| * $p < 0.05$ , ** $p < 0.01$ , *** $p < 0.001$                         |     |

|                         |                           |
|-------------------------|---------------------------|
|                         | M30                       |
| SSuperior               |                           |
| HDL-cholesterol (mg/dl) | -0.001<br>[-0.004,0.001]  |
| T1DM                    | 0.000<br>[0.000,0.000]    |
| Constant                | 0.288***<br>[0.147,0.429] |

|                                                                        |     |
|------------------------------------------------------------------------|-----|
| Observations                                                           | 106 |
| 95% confidence intervals in brackets                                   |     |
| Values are regression coefficients from fractional GLM with logit link |     |
| * $p < 0.05$ , ** $p < 0.01$ , *** $p < 0.001$                         |     |

|                     |                         |
|---------------------|-------------------------|
|                     | M31                     |
| SSuperior           |                         |
| Cholesterol (mg/dl) | 0.000<br>[-0.001,0.002] |
| T1DM                | 0.000<br>[0.000,0.000]  |
| Constant            | 0.171<br>[-0.049,0.391] |

|                                                                        |     |
|------------------------------------------------------------------------|-----|
| Observations                                                           | 106 |
| 95% confidence intervals in brackets                                   |     |
| Values are regression coefficients from fractional GLM with logit link |     |
| * $p < 0.05$ , ** $p < 0.01$ , *** $p < 0.001$                         |     |

|                       |       |
|-----------------------|-------|
|                       | M32   |
| SSuperior             |       |
| Triglycerides (mg/dl) | 0.000 |

[-0.001,0.001]

T1DM 0.000  
[0.000,0.000]

Constant 0.185\*\*\*  
[0.111,0.260]

Observations 106

95% confidence intervals in brackets

Values are regression coefficients from fractional GLM with logit link

\*  $p < 0.05$ , \*\*  $p < 0.01$ , \*\*\*  $p < 0.001$

M33

SNasal  
Age (years) 0.001  
[-0.002,0.005]

T1DM -0.055\*\*  
[-0.093,-0.016]

Constant 0.262\*\*\*  
[0.210,0.315]

Observations 202

95% confidence intervals in brackets

Values are regression coefficients from fractional GLM with logit link

\*  $p < 0.05$ , \*\*  $p < 0.01$ , \*\*\*  $p < 0.001$

M34

SNasal  
T1DM duration  
(years) 0.004  
[-0.001,0.009]

T1DM 0.000  
[0.000,0.000]

Constant 0.202\*\*\*  
[0.152,0.252]

Observations 106

95% confidence intervals in brackets

Values are regression coefficients from fractional GLM with logit link

\*  $p < 0.05$ , \*\*  $p < 0.01$ , \*\*\*  $p < 0.001$

M35

SNasal  
Age at onset (years) -0.004  
[-0.011,0.002]

T1DM 0.000  
[0.000,0.000]

Constant 0.267\*\*\*  
[0.210,0.323]

|                                                                        |     |
|------------------------------------------------------------------------|-----|
| Observations                                                           | 106 |
| 95% confidence intervals in brackets                                   |     |
| Values are regression coefficients from fractional GLM with logit link |     |
| * $p < 0.05$ , ** $p < 0.01$ , *** $p < 0.001$                         |     |

|                                  |                          |
|----------------------------------|--------------------------|
| M36                              |                          |
| SNasal                           |                          |
| Mean HbA1c from onset to OCT (%) | -0.022<br>[-0.057,0.014] |
| T1DM                             | 0.000<br>[0.000,0.000]   |
| Constant                         | 0.399**<br>[0.126,0.672] |

|                                                                        |     |
|------------------------------------------------------------------------|-----|
| Observations                                                           | 100 |
| 95% confidence intervals in brackets                                   |     |
| Values are regression coefficients from fractional GLM with logit link |     |
| * $p < 0.05$ , ** $p < 0.01$ , *** $p < 0.001$                         |     |

|                         |                          |
|-------------------------|--------------------------|
| M37                     |                          |
| SNasal                  |                          |
| LDL-cholesterol (mg/dl) | 0.000<br>[-0.001,0.002]  |
| T1DM                    | 0.000<br>[0.000,0.000]   |
| Constant                | 0.194**<br>[0.047,0.341] |

|                                                                        |     |
|------------------------------------------------------------------------|-----|
| Observations                                                           | 106 |
| 95% confidence intervals in brackets                                   |     |
| Values are regression coefficients from fractional GLM with logit link |     |
| * $p < 0.05$ , ** $p < 0.01$ , *** $p < 0.001$                         |     |

|                         |                           |
|-------------------------|---------------------------|
| M38                     |                           |
| SNasal                  |                           |
| HDL-cholesterol (mg/dl) | -0.002<br>[-0.005,0.000]  |
| T1DM                    | 0.000<br>[0.000,0.000]    |
| Constant                | 0.344***<br>[0.208,0.481] |

|                                                                        |     |
|------------------------------------------------------------------------|-----|
| Observations                                                           | 106 |
| 95% confidence intervals in brackets                                   |     |
| Values are regression coefficients from fractional GLM with logit link |     |
| * $p < 0.05$ , ** $p < 0.01$ , *** $p < 0.001$                         |     |

|                     |        |
|---------------------|--------|
| M39                 |        |
| SNasal              |        |
| Cholesterol (mg/dl) | -0.000 |

[-0.001,0.001]

T1DM 0.000  
[0.000,0.000]

Constant 0.234\*  
[0.014,0.455]

Observations 106

95% confidence intervals in brackets

Values are regression coefficients from fractional GLM with logit link

\*  $p < 0.05$ , \*\*  $p < 0.01$ , \*\*\*  $p < 0.001$

M40

SNasal  
Triglycerides (mg/dl) 0.000  
[-0.000,0.001]

T1DM 0.000  
[0.000,0.000]

Constant 0.209\*\*\*  
[0.153,0.266]

Observations 106

95% confidence intervals in brackets

Values are regression coefficients from fractional GLM with logit link

\*  $p < 0.05$ , \*\*  $p < 0.01$ , \*\*\*  $p < 0.001$

M41

SIinferior  
Age (years) 0.003  
[-0.001,0.006]

T1DM -0.051\*  
[-0.091,-0.010]

Constant 0.208\*\*\*  
[0.147,0.269]

Observations 202

95% confidence intervals in brackets

Values are regression coefficients from fractional GLM with logit link

\*  $p < 0.05$ , \*\*  $p < 0.01$ , \*\*\*  $p < 0.001$

M42

SIinferior  
T1DM duration  
(years) -0.000  
[-0.006,0.006]

T1DM 0.000  
[0.000,0.000]

Constant 0.199\*\*\*  
[0.150,0.248]

|                                                                        |     |
|------------------------------------------------------------------------|-----|
| Observations                                                           | 106 |
| 95% confidence intervals in brackets                                   |     |
| Values are regression coefficients from fractional GLM with logit link |     |
| * $p < 0.05$ , ** $p < 0.01$ , *** $p < 0.001$                         |     |

|                      |                           |
|----------------------|---------------------------|
| M43                  |                           |
| SIinferior           |                           |
| Age at onset (years) | 0.002<br>[-0.005,0.008]   |
| T1DM                 | 0.000<br>[0.000,0.000]    |
| Constant             | 0.183***<br>[0.119,0.247] |

|                                                                        |     |
|------------------------------------------------------------------------|-----|
| Observations                                                           | 106 |
| 95% confidence intervals in brackets                                   |     |
| Values are regression coefficients from fractional GLM with logit link |     |
| * $p < 0.05$ , ** $p < 0.01$ , *** $p < 0.001$                         |     |

|                                  |                          |
|----------------------------------|--------------------------|
| M44                              |                          |
| SIinferior                       |                          |
| Mean HbA1c from onset to OCT (%) | -0.027<br>[-0.076,0.022] |
| T1DM                             | 0.000<br>[0.000,0.000]   |
| Constant                         | 0.406*<br>[0.041,0.771]  |

|                                                                        |     |
|------------------------------------------------------------------------|-----|
| Observations                                                           | 100 |
| 95% confidence intervals in brackets                                   |     |
| Values are regression coefficients from fractional GLM with logit link |     |
| * $p < 0.05$ , ** $p < 0.01$ , *** $p < 0.001$                         |     |

|                         |                         |
|-------------------------|-------------------------|
| M45                     |                         |
| SIinferior              |                         |
| LDL-cholesterol (mg/dl) | 0.000<br>[-0.001,0.002] |
| T1DM                    | 0.000<br>[0.000,0.000]  |
| Constant                | 0.182*<br>[0.038,0.326] |

|                                                                        |     |
|------------------------------------------------------------------------|-----|
| Observations                                                           | 106 |
| 95% confidence intervals in brackets                                   |     |
| Values are regression coefficients from fractional GLM with logit link |     |
| * $p < 0.05$ , ** $p < 0.01$ , *** $p < 0.001$                         |     |

|                 |        |
|-----------------|--------|
| M46             |        |
| SIinferior      |        |
| HDL-cholesterol | -0.002 |

|              |                                       |
|--------------|---------------------------------------|
| (mg/dl)      | [-0.004,0.001]                        |
| T1DM         | 0.000<br>[0.000,0.000]                |
| Constant     | 0.294 <sup>***</sup><br>[0.155,0.433] |
| Observations | 106                                   |

95% confidence intervals in brackets

Values are regression coefficients from fractional GLM with logit link

\*  $p < 0.05$ , \*\*  $p < 0.01$ , \*\*\*  $p < 0.001$

|                     |                         |
|---------------------|-------------------------|
| M47                 |                         |
| SIinferior          |                         |
| Cholesterol (mg/dl) | 0.000<br>[-0.001,0.001] |
| T1DM                | 0.000<br>[0.000,0.000]  |
| Constant            | 0.197<br>[-0.025,0.419] |
| Observations        | 106                     |

95% confidence intervals in brackets

Values are regression coefficients from fractional GLM with logit link

\*  $p < 0.05$ , \*\*  $p < 0.01$ , \*\*\*  $p < 0.001$

|                       |                                       |
|-----------------------|---------------------------------------|
| M48                   |                                       |
| SIinferior            |                                       |
| Triglycerides (mg/dl) | 0.001<br>[-0.000,0.002]               |
| T1DM                  | 0.000<br>[0.000,0.000]                |
| Constant              | 0.160 <sup>***</sup><br>[0.093,0.227] |
| Observations          | 106                                   |

95% confidence intervals in brackets

Values are regression coefficients from fractional GLM with logit link

\*  $p < 0.05$ , \*\*  $p < 0.01$ , \*\*\*  $p < 0.001$

|             |                                          |
|-------------|------------------------------------------|
| M49         |                                          |
| DFovea      |                                          |
| Age (years) | 0.009<br>[-0.003,0.020]                  |
| T1DM        | 0.099<br>[-0.005,0.204]                  |
| Constant    | -0.949 <sup>***</sup><br>[-1.129,-0.769] |



|                                                                                                                                                                  |                              |
|------------------------------------------------------------------------------------------------------------------------------------------------------------------|------------------------------|
| Observations                                                                                                                                                     | 202                          |
| 95% confidence intervals in brackets<br>Values are regression coefficients from fractional GLM with logit link<br>* $p < 0.05$ , ** $p < 0.01$ , *** $p < 0.001$ |                              |
| M50                                                                                                                                                              |                              |
| DFovea                                                                                                                                                           |                              |
| T1DM duration (years)                                                                                                                                            | 0.001<br>[-0.013,0.015]      |
| T1DM                                                                                                                                                             | 0.000<br>[0.000,0.000]       |
| Constant                                                                                                                                                         | -0.716***<br>[-0.848,-0.584] |
| Observations                                                                                                                                                     | 106                          |
| 95% confidence intervals in brackets<br>Values are regression coefficients from fractional GLM with logit link<br>* $p < 0.05$ , ** $p < 0.01$ , *** $p < 0.001$ |                              |
| M51                                                                                                                                                              |                              |
| DFovea                                                                                                                                                           |                              |
| Age at onset (years)                                                                                                                                             | 0.005<br>[-0.015,0.025]      |
| T1DM                                                                                                                                                             | 0.000<br>[0.000,0.000]       |
| Constant                                                                                                                                                         | -0.753***<br>[-0.956,-0.550] |
| Observations                                                                                                                                                     | 106                          |
| 95% confidence intervals in brackets<br>Values are regression coefficients from fractional GLM with logit link<br>* $p < 0.05$ , ** $p < 0.01$ , *** $p < 0.001$ |                              |
| M52                                                                                                                                                              |                              |
| DFovea                                                                                                                                                           |                              |
| Mean HbA1c from onset to OCT (%)                                                                                                                                 | -0.002<br>[-0.053,0.049]     |
| T1DM                                                                                                                                                             | 0.000<br>[0.000,0.000]       |
| Constant                                                                                                                                                         | -0.695***<br>[-1.109,-0.281] |
| Observations                                                                                                                                                     | 100                          |
| 95% confidence intervals in brackets<br>Values are regression coefficients from fractional GLM with logit link<br>* $p < 0.05$ , ** $p < 0.01$ , *** $p < 0.001$ |                              |
| M53                                                                                                                                                              |                              |
| DFovea                                                                                                                                                           |                              |
| LDL-cholesterol                                                                                                                                                  | 0.002                        |

|              |                              |
|--------------|------------------------------|
| (mg/dl)      | [-0.002,0.006]               |
| T1DM         | 0.000<br>[0.000,0.000]       |
| Constant     | -0.937***<br>[-1.331,-0.543] |
| Observations | 106                          |

95% confidence intervals in brackets

Values are regression coefficients from fractional GLM with logit link

\*  $p < 0.05$ , \*\*  $p < 0.01$ , \*\*\*  $p < 0.001$

|                            |                              |
|----------------------------|------------------------------|
| M54                        |                              |
| DFovea                     |                              |
| HDL-cholesterol<br>(mg/dl) | 0.005<br>[-0.002,0.012]      |
| T1DM                       | 0.000<br>[0.000,0.000]       |
| Constant                   | -0.971***<br>[-1.331,-0.610] |
| Observations               | 106                          |

95% confidence intervals in brackets

Values are regression coefficients from fractional GLM with logit link

\*  $p < 0.05$ , \*\*  $p < 0.01$ , \*\*\*  $p < 0.001$

|                     |                              |
|---------------------|------------------------------|
| M55                 |                              |
| DFovea              |                              |
| Cholesterol (mg/dl) | 0.002<br>[-0.001,0.006]      |
| T1DM                | 0.000<br>[0.000,0.000]       |
| Constant            | -1.106***<br>[-1.641,-0.571] |
| Observations        | 106                          |

95% confidence intervals in brackets

Values are regression coefficients from fractional GLM with logit link

\*  $p < 0.05$ , \*\*  $p < 0.01$ , \*\*\*  $p < 0.001$

|                       |                              |
|-----------------------|------------------------------|
| M56                   |                              |
| DFovea                |                              |
| Triglycerides (mg/dl) | -0.000<br>[-0.002,0.002]     |
| T1DM                  | 0.000<br>[0.000,0.000]       |
| Constant              | -0.710***<br>[-0.861,-0.558] |

|                                                                                                                                                                  |                             |
|------------------------------------------------------------------------------------------------------------------------------------------------------------------|-----------------------------|
| Observations                                                                                                                                                     | 106                         |
| 95% confidence intervals in brackets<br>Values are regression coefficients from fractional GLM with logit link<br>* $p < 0.05$ , ** $p < 0.01$ , *** $p < 0.001$ |                             |
| M57                                                                                                                                                              |                             |
| DParaFovea                                                                                                                                                       |                             |
| Age (years)                                                                                                                                                      | -0.000<br>[-0.003,0.002]    |
| T1DM                                                                                                                                                             | -0.037**<br>[-0.063,-0.012] |
| Constant                                                                                                                                                         | 0.626***<br>[0.590,0.662]   |
| Observations                                                                                                                                                     | 202                         |
| 95% confidence intervals in brackets<br>Values are regression coefficients from fractional GLM with logit link<br>* $p < 0.05$ , ** $p < 0.01$ , *** $p < 0.001$ |                             |
| M58                                                                                                                                                              |                             |
| DParaFovea                                                                                                                                                       |                             |
| T1DM duration<br>(years)                                                                                                                                         | -0.003<br>[-0.007,0.000]    |
| T1DM                                                                                                                                                             | 0.000<br>[0.000,0.000]      |
| Constant                                                                                                                                                         | 0.608***<br>[0.580,0.636]   |
| Observations                                                                                                                                                     | 106                         |
| 95% confidence intervals in brackets<br>Values are regression coefficients from fractional GLM with logit link<br>* $p < 0.05$ , ** $p < 0.01$ , *** $p < 0.001$ |                             |
| M59                                                                                                                                                              |                             |
| DParaFovea                                                                                                                                                       |                             |
| Age at onset (years)                                                                                                                                             | 0.005*<br>[0.001,0.009]     |
| T1DM                                                                                                                                                             | 0.000<br>[0.000,0.000]      |
| Constant                                                                                                                                                         | 0.541***<br>[0.494,0.587]   |
| Observations                                                                                                                                                     | 106                         |
| 95% confidence intervals in brackets<br>Values are regression coefficients from fractional GLM with logit link<br>* $p < 0.05$ , ** $p < 0.01$ , *** $p < 0.001$ |                             |
| M60                                                                                                                                                              |                             |
| DParaFovea                                                                                                                                                       |                             |
| Mean HbA1c from                                                                                                                                                  | -0.040**                    |

|                  |                 |
|------------------|-----------------|
| onset to OCT (%) | [-0.070,-0.010] |
|------------------|-----------------|

|      |                        |
|------|------------------------|
| T1DM | 0.000<br>[0.000,0.000] |
|------|------------------------|

|          |                           |
|----------|---------------------------|
| Constant | 0.892***<br>[0.666,1.118] |
|----------|---------------------------|

|              |     |
|--------------|-----|
| Observations | 100 |
|--------------|-----|

95% confidence intervals in brackets

Values are regression coefficients from fractional GLM with logit link

\*  $p < 0.05$ , \*\*  $p < 0.01$ , \*\*\*  $p < 0.001$

|     |
|-----|
| M61 |
|-----|

|                 |                |
|-----------------|----------------|
| DParaFovea      |                |
| LDL-cholesterol | 0.000          |
| (mg/dl)         | [-0.001,0.001] |

|      |                        |
|------|------------------------|
| T1DM | 0.000<br>[0.000,0.000] |
|------|------------------------|

|          |                           |
|----------|---------------------------|
| Constant | 0.548***<br>[0.458,0.639] |
|----------|---------------------------|

|              |     |
|--------------|-----|
| Observations | 106 |
|--------------|-----|

95% confidence intervals in brackets

Values are regression coefficients from fractional GLM with logit link

\*  $p < 0.05$ , \*\*  $p < 0.01$ , \*\*\*  $p < 0.001$

|     |
|-----|
| M62 |
|-----|

|                 |                |
|-----------------|----------------|
| DParaFovea      |                |
| HDL-cholesterol | 0.000          |
| (mg/dl)         | [-0.001,0.001] |

|      |                        |
|------|------------------------|
| T1DM | 0.000<br>[0.000,0.000] |
|------|------------------------|

|          |                           |
|----------|---------------------------|
| Constant | 0.580***<br>[0.507,0.654] |
|----------|---------------------------|

|              |     |
|--------------|-----|
| Observations | 106 |
|--------------|-----|

95% confidence intervals in brackets

Values are regression coefficients from fractional GLM with logit link

\*  $p < 0.05$ , \*\*  $p < 0.01$ , \*\*\*  $p < 0.001$

|     |
|-----|
| M63 |
|-----|

|                     |                |
|---------------------|----------------|
| DParaFovea          |                |
| Cholesterol (mg/dl) | 0.000          |
|                     | [-0.001,0.001] |

|      |                        |
|------|------------------------|
| T1DM | 0.000<br>[0.000,0.000] |
|------|------------------------|

|          |                           |
|----------|---------------------------|
| Constant | 0.545***<br>[0.396,0.694] |
|----------|---------------------------|

|                                                                                                                                                                  |                              |
|------------------------------------------------------------------------------------------------------------------------------------------------------------------|------------------------------|
| Observations                                                                                                                                                     | 106                          |
| 95% confidence intervals in brackets<br>Values are regression coefficients from fractional GLM with logit link<br>* $p < 0.05$ , ** $p < 0.01$ , *** $p < 0.001$ |                              |
| M64                                                                                                                                                              |                              |
| DParaFovea<br>Triglycerides (mg/dl)                                                                                                                              | -0.000<br>[-0.001,0.001]     |
| T1DM                                                                                                                                                             | 0.000<br>[0.000,0.000]       |
| Constant                                                                                                                                                         | 0.585***<br>[0.546,0.624]    |
| Observations                                                                                                                                                     | 106                          |
| 95% confidence intervals in brackets<br>Values are regression coefficients from fractional GLM with logit link<br>* $p < 0.05$ , ** $p < 0.01$ , *** $p < 0.001$ |                              |
| M65                                                                                                                                                              |                              |
| DTemporal<br>Age (years)                                                                                                                                         | -0.004<br>[-0.007,0.000]     |
| T1DM                                                                                                                                                             | -0.057***<br>[-0.087,-0.027] |
| Constant                                                                                                                                                         | 0.658***<br>[0.599,0.718]    |
| Observations                                                                                                                                                     | 202                          |
| 95% confidence intervals in brackets<br>Values are regression coefficients from fractional GLM with logit link<br>* $p < 0.05$ , ** $p < 0.01$ , *** $p < 0.001$ |                              |
| M66                                                                                                                                                              |                              |
| DTemporal<br>T1DM duration<br>(years)                                                                                                                            | -0.003<br>[-0.009,0.003]     |
| T1DM                                                                                                                                                             | 0.000<br>[0.000,0.000]       |
| Constant                                                                                                                                                         | 0.567***<br>[0.522,0.612]    |
| Observations                                                                                                                                                     | 106                          |
| 95% confidence intervals in brackets<br>Values are regression coefficients from fractional GLM with logit link<br>* $p < 0.05$ , ** $p < 0.01$ , *** $p < 0.001$ |                              |
| M67                                                                                                                                                              |                              |
| DTemporal<br>Age at onset (years)                                                                                                                                | 0.002                        |

[-0.004,0.009]

T1DM 0.000  
[0.000,0.000]

Constant 0.526\*\*\*  
[0.467,0.586]

Observations 106

95% confidence intervals in brackets

Values are regression coefficients from fractional GLM with logit link

\*  $p < 0.05$ , \*\*  $p < 0.01$ , \*\*\*  $p < 0.001$

M68

DTemporal  
Mean HbA1c from  
onset to OCT (%) -0.029\*  
[-0.052,-0.005]

T1DM 0.000  
[0.000,0.000]

Constant 0.769\*\*\*  
[0.589,0.949]

Observations 100

95% confidence intervals in brackets

Values are regression coefficients from fractional GLM with logit link

\*  $p < 0.05$ , \*\*  $p < 0.01$ , \*\*\*  $p < 0.001$

M69

DTemporal  
LDL-cholesterol  
(mg/dl) -0.000  
[-0.001,0.001]

T1DM 0.000  
[0.000,0.000]

Constant 0.571\*\*\*  
[0.455,0.686]

Observations 106

95% confidence intervals in brackets

Values are regression coefficients from fractional GLM with logit link

\*  $p < 0.05$ , \*\*  $p < 0.01$ , \*\*\*  $p < 0.001$

M70

DTemporal  
HDL-cholesterol  
(mg/dl) 0.000  
[-0.002,0.002]

T1DM 0.000  
[0.000,0.000]

Constant 0.526\*\*\*  
[0.421,0.632]

|                                                                        |     |
|------------------------------------------------------------------------|-----|
| Observations                                                           | 106 |
| 95% confidence intervals in brackets                                   |     |
| Values are regression coefficients from fractional GLM with logit link |     |
| * $p < 0.05$ , ** $p < 0.01$ , *** $p < 0.001$                         |     |

|                     |                           |
|---------------------|---------------------------|
| M71                 |                           |
| DTemporal           |                           |
| Cholesterol (mg/dl) | -0.000<br>[-0.001,0.001]  |
| T1DM                | 0.000<br>[0.000,0.000]    |
| Constant            | 0.574***<br>[0.409,0.739] |

|                                                                        |     |
|------------------------------------------------------------------------|-----|
| Observations                                                           | 106 |
| 95% confidence intervals in brackets                                   |     |
| Values are regression coefficients from fractional GLM with logit link |     |
| * $p < 0.05$ , ** $p < 0.01$ , *** $p < 0.001$                         |     |

|                       |                           |
|-----------------------|---------------------------|
| M72                   |                           |
| DTemporal             |                           |
| Triglycerides (mg/dl) | -0.000<br>[-0.001,0.001]  |
| T1DM                  | 0.000<br>[0.000,0.000]    |
| Constant              | 0.566***<br>[0.512,0.620] |

|                                                                        |     |
|------------------------------------------------------------------------|-----|
| Observations                                                           | 106 |
| 95% confidence intervals in brackets                                   |     |
| Values are regression coefficients from fractional GLM with logit link |     |
| * $p < 0.05$ , ** $p < 0.01$ , *** $p < 0.001$                         |     |

|             |                           |
|-------------|---------------------------|
| M73         |                           |
| DSuperior   |                           |
| Age (years) | -0.002<br>[-0.006,0.002]  |
| T1DM        | -0.004<br>[-0.038,0.029]  |
| Constant    | 0.672***<br>[0.616,0.729] |

|                                                                        |     |
|------------------------------------------------------------------------|-----|
| Observations                                                           | 202 |
| 95% confidence intervals in brackets                                   |     |
| Values are regression coefficients from fractional GLM with logit link |     |
| * $p < 0.05$ , ** $p < 0.01$ , *** $p < 0.001$                         |     |

|               |        |
|---------------|--------|
| M74           |        |
| DSuperior     |        |
| T1DM duration | -0.002 |

|              |                                       |
|--------------|---------------------------------------|
| (years)      | [-0.006,0.003]                        |
| T1DM         | 0.000<br>[0.000,0.000]                |
| Constant     | 0.650 <sup>***</sup><br>[0.610,0.691] |
| Observations | 106                                   |

95% confidence intervals in brackets

Values are regression coefficients from fractional GLM with logit link

\*  $p < 0.05$ , \*\*  $p < 0.01$ , \*\*\*  $p < 0.001$

|                      |                                       |
|----------------------|---------------------------------------|
|                      | M75                                   |
| DSuperior            |                                       |
| Age at onset (years) | 0.001<br>[-0.004,0.007]               |
| T1DM                 | 0.000<br>[0.000,0.000]                |
| Constant             | 0.628 <sup>***</sup><br>[0.570,0.686] |
| Observations         | 106                                   |

95% confidence intervals in brackets

Values are regression coefficients from fractional GLM with logit link

\*  $p < 0.05$ , \*\*  $p < 0.01$ , \*\*\*  $p < 0.001$
